# Supplementary material for: HAG regimen improves survival in adult patients with hypocellular acute myeloid leukemia
Source: PubMed Central journal article supplement (PMC4823132; doi:10.18632/oncotarget.6211), 2015-10-21
Supplement: oncotarget-07-3623-s001.pdf [file oncotarget-07-3623-s001.pdf]

## HAG regimen improves survival in adult patients with hypocellular acute myeloid leukemia

### Supplementary Material

Table S1. Cardiac and liver toxicity during XA and HAG induction.

|                                | XA        | HAG       | <i>P</i> |
|--------------------------------|-----------|-----------|----------|
| <b>No. of patients</b>         | 27        | 16        |          |
| <b>Abnormal E.C.G.</b>         |           |           | 0.471    |
| T wave changes                 | 4 (14.8%) | 2 (12.5%) |          |
| RBBB                           | 1 (3.7%)  | 2 (12.5%) |          |
| LBBB                           | 1 (3.7%)  | 0         |          |
| Long QT interval               | 0         | 1 (6.25%) |          |
| <b>Abnormal liver function</b> |           |           | 0.365    |
| ALT                            | 3 (11.1%) | 3 (18.7%) |          |
| AST                            | 2 (7.4%)  | 3 (18.7%) |          |

*RBBB, Right bundle branch block; LBBB, Left bundle branch block; ALT, alanine aminotransferase; AST, aspartate aminotransferase*
